# Supplementary material
Source: publisher figshare collection journal article supplement (https://gsajournals.figshare.com/ndownloader/files/35058967)
Supplement: Supplementary file 1 [file 35058967]

ID	DadID	MaID
1	0	0
2	0	0
3	0	0
4	0	0
5	0	0
6	0	0
7	0	0
8	0	0
9	0	0
10	0	0
11	0	0
12	0	0
13	0	0
14	0	0
15	0	0
16	0	0
17	0	0
18	0	0
19	0	0
20	0	0
21	0	0
22	0	0
23	0	0
24	0	0
25	0	0
26	0	0
27	0	0
28	0	0
29	0	0
30	0	0
31	0	0
32	0	0
33	0	0
34	0	0
35	0	0
36	0	0
37	0	0
38	0	0
39	0	0
40	0	0
41	0	0
42	0	0
43	0	0
44	0	0
45	0	0
46	0	0
47	0	0
48	0	0
49	0	0
50	0	0
51	0	0
52	0	0
53	0	0
54	0	0
55	0	0
56	0	0
57	0	0
58	0	0
59	0	0
60	0	0
61	0	0
62	0	0
63	0	0
64	0	0
65	0	0
66	0	0
67	0	0
68	0	0
69	0	0
70	0	0
71	0	0
72	0	0
73	0	0
74	0	0
75	0	0
76	0	0
77	0	0
78	0	0
79	0	0
80	0	0
81	0	0
82	0	0
83	0	0
84	0	0
85	0	0
86	0	0
87	0	0
88	0	0
89	0	0
90	0	0
91	0	0
92	0	0
93	0	0
94	0	0
95	0	0
96	0	0
97	0	0
98	0	0
99	0	0
100	0	0
101	0	0
102	0	0
103	0	0
104	0	0
105	0	0
106	0	0
107	0	0
108	0	0
109	0	0
110	0	0
111	0	0
112	0	0
113	0	0
114	0	0
115	0	0
116	0	0
117	0	0
118	0	0
119	0	0
120	0	0
121	0	0
122	0	0
123	0	0
124	0	0
125	0	0
126	0	0
127	0	0
128	0	0
129	0	0
130	0	0
131	0	0
132	0	0
133	0	0
134	0	0
135	0	0
136	0	0
137	0	0
138	0	0
139	0	0
140	0	0
141	0	0
142	0	0
143	0	0
144	0	0
145	0	0
146	0	0
147	0	0
148	0	0
149	0	0
150	0	0
151	0	0
152	0	0
153	0	0
154	0	0
155	0	0
156	0	0
157	0	0
158	0	0
159	0	0
160	0	0
161	0	0
162	0	0
163	0	0
164	0	0
165	0	0
166	0	0
167	0	0
168	0	0
169	0	0
170	0	0
171	0	0
172	0	0
173	0	0
174	0	0
175	0	0
176	0	0
177	0	0
178	0	0
179	0	0
180	0	0
181	0	0
182	0	0
183	0	0
184	0	0
185	0	0
186	0	0
187	0	0
188	0	0
189	0	0
190	0	0
191	0	0
192	0	0
193	0	0
194	0	0
195	0	0
196	0	0
197	0	0
198	0	0
199	0	0
200	0	0
201	0	0
202	0	0
203	0	0
204	0	0
205	0	0
206	0	0
207	0	0
208	0	0
209	0	0
210	0	0
211	0	0
212	0	0
213	0	0
214	0	0
215	0	0
216	0	0
217	206	0
218	0	205
219	0	0
220	0	0
221	0	0
222	0	0
223	0	0
224	0	0
225	0	0
226	0	204
227	0	0
228	0	0
229	0	0
230	0	0
231	0	0
232	0	0
233	0	0
234	0	0
235	0	0
236	0	0
237	0	0
238	206	0
239	0	0
240	0	0
241	0	0
242	0	204
243	0	0
244	0	205
245	0	0
246	0	0
247	0	0
248	0	0
249	218	217
250	0	0
251	0	0
252	0	0
253	0	0
254	207	0
255	219	0
256	0	0
257	0	0
258	0	0
259	0	0
260	0	0
261	0	0
262	0	0
263	0	0
264	202	0
265	0	224
266	0	0
267	251	0
268	225	0
269	0	0
270	0	0
271	202	0
272	0	0
273	0	0
274	0	0
275	227	0
276	0	0
277	0	0
278	0	228
279	219	0
280	0	0
281	0	0
282	0	0
283	202	0
284	0	0
285	0	0
286	0	0
287	0	0
288	0	0
289	0	0
290	0	0
291	0	0
292	0	0
293	0	0
294	208	0
295	202	0
296	0	0
297	203	0
298	209	0
299	0	0
300	0	0
301	230	0
302	207	231
303	0	0
304	202	0
305	208	0
306	0	0
307	0	0
308	0	0
309	0	0
310	0	0
311	0	0
312	0	0
313	0	0
314	227	0
315	203	0
316	0	0
317	0	0
318	0	0
319	0	0
320	0	0
321	0	0
322	211	0
323	0	0
324	0	0
325	0	0
326	227	0
327	202	0
328	0	0
329	211	0
330	207	232
331	0	0
332	212	0
333	229	235
334	208	0
335	207	0
336	0	0
337	227	231
338	202	0
339	0	0
340	202	0
341	0	0
342	0	0
343	227	0
344	0	0
345	230	222
346	0	0
347	209	0
348	208	0
349	207	0
350	212	0
351	202	0
352	207	0
353	225	0
354	241	240
355	0	0
356	0	0
357	242	214
358	0	0
359	0	0
360	244	215
361	0	0
362	0	0
363	246	245
364	0	0
365	247	0
366	248	0
367	249	216
368	0	0
369	250	0
370	251	0
371	250	216
372	252	0
373	0	0
374	253	0
375	0	0
376	0	0
377	256	0
378	242	220
379	0	0
380	257	245
381	244	221
382	258	0
383	0	0
384	259	0
385	0	0
386	260	222
387	0	0
388	262	223
389	0	0
390	0	0
391	242	214
392	0	0
393	242	220
394	0	0
395	266	0
396	269	0
397	0	0
398	244	224
399	225	270
400	269	0
401	273	0
402	226	274
403	242	275
404	253	0
405	267	0
406	276	0
407	0	0
408	266	0
409	246	281
410	246	0
411	242	0
412	282	0
413	284	0
414	0	0
415	285	0
416	286	0
417	287	0
418	289	288
419	284	0
420	0	0
421	0	0
422	0	0
423	0	0
424	290	0
425	0	0
426	0	0
427	0	0
428	0	0
429	229	0
430	244	292
431	241	293
432	242	220
433	266	240
434	260	0
435	0	0
436	207	0
437	272	0
438	225	0
439	251	0
440	0	0
441	225	0
442	427	0
443	0	0
444	267	0
445	0	0
446	0	0
447	244	215
448	272	298
449	0	0
450	0	0
451	0	0
452	258	0
453	303	0
454	267	0
455	244	0
456	289	288
457	289	0
458	308	307
459	225	0
460	310	0
461	272	0
462	251	0
463	246	281
464	312	0
465	276	0
466	313	0
467	273	0
468	272	0
469	210	0
470	242	214
471	225	232
472	272	0
473	257	0
474	317	0
475	474	0
476	272	0
477	259	233
478	318	233
479	320	319
480	253	321
481	253	0
482	0	263
483	0	0
484	312	0
485	242	0
486	323	0
487	266	0
488	0	0
489	313	0
490	269	228
491	272	328
492	0	0
493	272	0
494	234	0
495	316	0
496	253	0
497	0	0
498	282	0
499	272	0
500	331	277
501	317	0
502	0	0
503	502	0
504	0	0
505	225	0
506	225	0
507	303	0
508	272	0
509	236	0
510	203	0
511	262	222
512	0	0
513	236	0
514	259	0
515	247	0
516	234	325
517	236	0
518	266	213
519	225	0
520	251	0
521	323	0
522	272	0
523	244	221
524	253	321
525	242	321
526	234	0
527	0	0
528	0	270
529	272	0
530	210	0
531	0	0
532	450	0
533	272	0
534	0	0
535	247	0
536	0	215
537	0	0
538	256	0
539	244	221
540	253	321
541	0	0
542	310	0
543	0	0
544	259	0
545	242	0
546	0	0
547	227	0
548	267	0
549	284	0
550	247	293
551	236	295
552	234	0
553	207	283
554	0	0
555	272	0
556	227	0
557	0	0
558	320	0
559	258	346
560	0	0
561	0	0
562	0	0
563	0	0
564	272	0
565	272	336
566	236	0
567	234	0
568	252	0
569	279	332
570	318	233
571	258	0
572	244	292
573	234	0
574	227	0
575	355	0
576	356	0
577	358	243
578	360	359
579	362	361
580	356	364
581	366	365
582	0	0
583	369	368
584	360	0
585	371	0
586	355	0
587	373	0
588	374	0
589	255	254
590	376	375
591	377	0
592	0	0
593	358	0
594	380	379
595	354	381
596	0	0
597	0	0
598	383	0
599	385	0
600	599	384
601	387	261
602	389	388
603	390	263
604	0	0
605	367	391
606	392	0
607	360	0
608	394	393
609	265	264
610	267	395
611	397	0
612	396	0
613	267	395
614	398	0
615	255	399
616	257	0
617	398	400
618	272	271
619	354	401
620	403	402
621	405	404
622	360	277
623	355	0
624	265	0
625	248	0
626	360	0
627	392	0
628	265	0
629	267	395
630	278	407
631	371	0
632	360	408
633	279	0
634	374	409
635	0	391
636	0	0
637	362	379
638	414	0
639	416	415
640	0	0
641	421	420
642	422	0
643	423	0
644	423	0
645	425	0
646	421	0
647	426	0
648	427	0
649	428	291
650	599	429
651	272	0
652	371	0
653	278	0
654	257	0
655	257	0
656	278	294
657	280	0
658	396	0
659	360	433
660	265	436
661	369	437
662	278	438
663	280	295
664	371	0
665	360	277
666	440	0
667	280	441
668	280	0
669	443	0
670	435	0
671	296	0
672	0	0
673	446	445
674	374	0
675	371	0
676	280	297
677	272	0
678	398	0
679	265	0
680	449	300
681	450	291
682	451	0
683	428	291
684	389	301
685	396	304
686	371	455
687	306	305
688	426	0
689	309	0
690	0	0
691	278	459
692	377	460
693	272	0
694	369	461
695	355	462
696	360	311
697	396	0
698	442	261
699	385	0
700	265	314
701	374	357
702	467	0
703	227	469
704	360	368
705	226	471
706	316	472
707	449	300
708	449	0
709	306	0
710	394	0
711	451	483
712	272	484
713	0	0
714	306	0
715	380	485
716	265	322
717	488	487
718	405	0
719	435	489
720	385	324
721	226	0
722	446	445
723	397	0
724	358	243
725	280	325
726	371	0
727	403	326
728	272	327
729	280	274
730	280	0
731	398	0
732	278	283
733	306	459
734	279	0
735	396	330
736	279	495
737	497	0
738	737	388
739	355	0
740	316	499
741	360	311
742	377	500
743	737	503
744	504	0
745	389	0
746	278	505
747	265	436
748	355	0
749	265	506
750	280	332
751	272	334
752	272	335
753	249	0
754	278	510
755	360	0
756	373	0
757	355	0
758	403	336
759	512	511
760	435	514
761	354	515
762	226	0
763	396	516
764	280	0
765	396	0
766	0	337
767	234	519
768	520	338
769	356	364
770	392	237
771	306	339
772	474	340
773	358	0
774	425	0
775	360	0
776	265	314
777	383	0
778	527	0
779	272	0
780	278	528
781	226	531
782	341	0
783	396	342
784	737	532
785	737	0
786	207	533
787	492	534
788	280	328
789	360	0
790	374	0
791	369	0
792	497	0
793	253	0
794	272	530
795	355	0
796	279	0
797	396	342
798	306	0
799	541	0
800	355	0
801	280	0
802	0	0
803	249	0
804	0	0
805	0	0
806	0	0
807	249	0
808	0	0
809	0	0
810	0	0
811	0	0
812	0	0
813	0	0
814	0	0
815	249	0
816	390	319
817	0	0
818	0	0
819	451	483
820	512	0
821	0	0
822	0	0
823	383	0
824	280	407
825	355	0
826	0	0
827	474	0
828	396	0
829	0	0
830	371	0
831	0	0
832	0	0
833	396	0
834	0	0
835	428	0
836	0	0
837	0	0
838	0	0
839	280	0
840	443	477
841	450	0
842	492	534
843	385	0
844	0	0
845	0	0
846	0	0
847	0	0
848	0	0
849	0	0
850	257	0
851	0	0
852	278	0
853	0	0
854	0	0
855	389	0
856	226	531
857	0	0
858	0	0
859	0	0
860	0	0
861	0	0
862	0	0
863	0	0
864	0	0
865	0	0
866	0	0
867	0	0
868	0	0
869	0	0
870	0	0
871	0	0
872	0	0
873	0	0
874	0	0
875	272	330
876	280	295
877	403	564
878	279	238
879	306	347
880	520	464
881	306	326
882	279	0
883	306	348
884	226	566
885	458	0
886	316	349
887	0	350
888	226	567
889	0	0
890	316	332
891	474	340
892	568	469
893	512	511
894	306	339
895	280	352
896	249	569
897	316	332
898	571	570
899	255	353
900	492	553
901	272	327
902	234	573
903	737	301
904	306	0
905	354	239
906	576	575
907	577	357
908	579	578
909	580	363
910	354	582
911	367	0
912	911	910
913	584	583
914	585	370
915	580	586
916	587	372
917	584	583
918	588	590
919	592	591
920	580	378
921	594	593
922	596	595
923	597	382
924	0	598
925	0	386
926	602	601
927	604	603
928	588	0
929	607	606
930	580	608
931	584	610
932	396	268
933	613	612
934	596	614
935	616	615
936	580	406
937	623	622
938	625	624
939	627	626
940	629	628
941	631	630
942	280	633
943	636	410
944	580	637
945	605	412
946	403	283
947	0	0
948	0	638
949	640	417
950	418	0
951	0	0
952	641	419
953	643	642
954	644	424
955	647	646
956	649	648
957	629	651
958	653	652
959	367	654
960	655	431
961	584	432
962	625	657
963	659	658
964	435	434
965	629	660
966	367	439
967	596	664
968	666	665
969	629	668
970	442	0
971	649	669
972	649	669
973	670	0
974	672	671
975	594	673
976	440	0
977	674	976
978	675	447
979	611	676
980	678	677
981	632	679
982	585	299
983	681	680
984	683	682
985	435	452
986	684	985
987	453	302
988	580	406
989	354	359
990	635	454
991	640	456
992	458	457
993	690	689
994	396	693
995	695	411
996	577	696
997	453	302
998	577	463
999	403	464
1000	354	582
1001	587	465
1002	613	697
1003	649	0
1004	681	680
1005	699	466
1006	701	905
1007	683	0
1008	579	578
1009	592	702
1010	396	468
1011	594	470
1012	588	704
1013	616	315
1014	435	0
1015	684	1014
1016	475	473
1017	625	476
1018	649	477
1019	707	0
1020	681	708
1021	479	478
1022	480	709
1023	710	481
1024	711	482
1025	480	714
1026	486	297
1027	707	600
1028	718	717
1029	442	720
1030	585	299
1031	636	444
1032	625	721
1033	587	722
1034	655	723
1035	605	724
1036	632	725
1037	577	726
1038	467	490
1039	613	728
1040	613	729
1041	492	491
1042	611	728
1043	396	493
1044	659	730
1045	403	494
1046	731	391
1047	659	733
1048	278	329
1049	616	735
1050	354	393
1051	405	496
1052	739	498
1053	577	741
1054	577	501
1055	745	744
1056	617	746
1057	616	315
1058	367	507
1059	403	508
1060	681	333
1061	678	753
1062	453	509
1063	278	329
1064	756	755
1065	594	757
1066	632	758
1067	492	513
1068	686	508
1069	396	762
1070	430	764
1071	617	765
1072	518	517
1073	354	239
1074	710	769
1075	675	521
1076	911	1075
1077	396	522
1078	607	704
1079	659	771
1080	675	523
1081	585	525
1082	773	526
1083	774	0
1084	613	522
1085	739	775
1086	739	775
1087	486	508
1088	778	777
1089	396	728
1090	613	779
1091	396	615
1092	278	529
1093	616	530
1094	430	781
1095	577	0
1096	611	1059
1097	678	783
1098	773	787
1099	396	343
1100	403	508
1101	634	1100
1102	653	535
1103	613	788
1104	607	536
1105	627	789
1106	611	791
1107	684	985
1108	442	0
1109	792	537
1110	585	538
1111	380	793
1112	0	0
1113	0	0
1114	0	0
1115	0	0
1116	0	0
1117	0	0
1118	0	0
1119	0	0
1120	629	794
1121	0	0
1122	0	0
1123	0	0
1124	577	795
1125	0	0
1126	0	0
1127	0	0
1128	0	0
1129	0	0
1130	0	0
1131	0	0
1132	0	0
1133	739	775
1134	0	0
1135	0	0
1136	0	0
1137	0	770
1138	0	0
1139	0	0
1140	0	0
1141	0	0
1142	0	0
1143	367	0
1144	701	1143
1145	0	0
1146	739	539
1147	367	540
1148	0	0
1149	0	0
1150	396	615
1151	632	796
1152	629	797
1153	0	0
1154	799	798
1155	0	0
1156	0	0
1157	0	0
1158	0	0
1159	0	0
1160	636	800
1161	587	722
1162	0	0
1163	403	801
1164	0	0
1165	0	0
1166	629	803
1167	0	0
1168	0	0
1169	0	0
1170	430	399
1171	0	0
1172	0	0
1173	403	807
1174	625	609
1175	0	0
1176	580	542
1177	0	0
1178	0	0
1179	0	0
1180	0	0
1181	613	788
1182	0	0
1183	0	0
1184	737	544
1185	585	525
1186	607	487
1187	792	537
1188	0	0
1189	707	0
1190	458	456
1191	675	815
1192	0	0
1193	711	816
1194	0	0
1195	0	0
1196	773	522
1197	0	0
1198	672	819
1199	820	0
1200	0	0
1201	0	0
1202	579	545
1203	0	0
1204	655	542
1205	0	823
1206	0	0
1207	0	0
1208	632	824
1209	607	825
1210	659	779
1211	366	0
1212	713	547
1213	607	548
1214	632	827
1215	631	828
1216	632	824
1217	0	0
1218	911	1050
1219	366	237
1220	830	550
1221	0	0
1222	613	833
1223	616	721
1224	778	835
1225	799	551
1226	486	552
1227	611	728
1228	0	0
1229	0	0
1230	396	526
1231	0	0
1232	737	544
1233	0	0
1234	0	0
1235	632	839
1236	629	553
1237	841	345
1238	0	0
1239	396	728
1240	430	842
1241	616	555
1242	403	472
1243	0	0
1244	0	0
1245	0	0
1246	737	843
1247	649	843
1248	607	748
1249	683	682
1250	613	556
1251	0	0
1252	0	0
1253	512	558
1254	584	850
1255	0	0
1256	911	1050
1257	611	852
1258	0	0
1259	711	855
1260	613	856
1261	681	559
1262	0	0
1263	675	447
1264	695	411
1265	0	0
1266	0	0
1267	0	0
1268	0	0
1269	0	0
1270	396	565
1271	367	507
1272	576	575
1273	396	615
1274	613	612
1275	492	351
1276	655	572
1277	249	574
1278	659	904
1279	403	491
1280	947	413
1281	951	950
1282	951	688
1283	947	782
1284	707	785
1285	951	1190
1286	885	1083
1287	713	712
1288	147	146
1289	951	1190
1290	43	0
1291	947	0
1292	613	96
1293	19	0
1294	613	96
1295	806	0
1296	1	0
1297	23	0
1298	68	0
1299	396	105
1300	396	105
1301	951	868
1302	192	0
1303	147	0
1304	10	0
1305	132	131
1306	132	131
1307	10	115
1308	613	140
1309	10	115
1310	802	0
1311	802	0
1312	802	0
1313	802	0
1314	613	140
1315	10	115
1316	10	115
1317	9	8
1318	78	77
1319	619	104
1320	12	0
1321	127	0
1322	127	129
1323	9	150
1324	12	156
1325	9	8
1326	12	165
1327	68	0
1328	806	0
1329	10	0
1330	670	0
1331	1197	0
1332	619	104
1333	670	829
1334	670	829
1335	670	834
1336	837	0
1337	1244	1243
1338	837	1265
1339	837	1265
1340	1244	872
1341	670	834
1342	802	0
1343	78	77
1344	1	0
1345	12	156
1346	605	0
1347	10	0
1348	12	165
1349	5	64
1350	619	459
1351	19	0
1352	43	0
1353	1	135
1354	57	136
1355	127	0
1356	605	741
1357	1	135
1358	167	173
1359	605	178
1360	605	741
1361	619	0
1362	167	173
1363	57	136
1364	1	135
1365	5	64
1366	947	873
1367	5	64
1368	1	135
1369	605	178
1370	1	135
1371	5	64
1372	21	20
1373	619	609
1374	619	609
1375	42	95
1376	19	130
1377	19	0
1378	167	166
1379	167	171
1380	127	0
1381	806	0
1382	619	609
1383	1177	810
1384	1177	810
1385	167	171
1386	619	609
1387	812	848
1388	139	186
1389	167	166
1390	806	561
1391	19	130
1392	42	95
1393	139	186
1394	1	32
1395	611	106
1396	1	32
1397	611	106
1398	1	32
1399	611	106
1400	611	106
1401	10	0
1402	605	0
1403	802	0
1404	813	1255
1405	813	854
1406	13	0
1407	13	0
1408	5	0
1409	49	0
1410	139	138
1411	139	138
1412	1194	0
1413	139	138
1414	870	1268
1415	611	193
1416	197	196
1417	44	0
1418	139	138
1419	19	0
1420	611	932
1421	45	58
1422	605	63
1423	1	90
1424	632	448
1425	1	114
1426	632	448
1427	169	168
1428	1	114
1429	611	932
1430	605	63
1431	1	114
1432	1	90
1433	1	114
1434	19	0
1435	57	56
1436	80	79
1437	80	79
1438	57	56
1439	632	117
1440	49	0
1441	57	162
1442	57	56
1443	632	117
1444	57	56
1445	806	0
1446	57	162
1447	1194	821
1448	1207	1206
1449	1207	1206
1450	1207	1206
1451	812	874
1452	80	79
1453	89	0
1454	21	0
1455	588	65
1456	80	0
1457	588	65
1458	57	748
1459	13	134
1460	45	0
1461	605	159
1462	605	172
1463	588	65
1464	813	1182
1465	57	748
1466	813	1182
1467	1207	0
1468	1169	1238
1469	605	172
1470	605	159
1471	605	0
1472	13	134
1473	1	0
1474	605	29
1475	41	0
1476	634	83
1477	86	85
1478	86	85
1479	0	0
1480	13	0
1481	122	161
1482	805	1171
1483	634	83
1484	813	0
1485	805	1171
1486	832	845
1487	832	849
1488	690	858
1489	605	29
1490	122	0
1491	605	27
1492	605	34
1493	41	0
1494	13	92
1495	41	0
1496	629	1043
1497	605	27
1498	0	0
1499	13	92
1500	605	27
1501	813	826
1502	813	826
1503	690	0
1504	690	0
1505	690	0
1506	605	27
1507	813	826
1508	563	1267
1509	605	34
1510	13	92
1511	41	0
1512	588	7
1513	13	0
1514	12	0
1515	12	0
1516	12	0
1517	670	0
1518	588	184
1519	670	831
1520	588	7
1521	670	708
1522	588	184
1523	12	11
1524	12	16
1525	12	11
1526	617	274
1527	605	411
1528	12	16
1529	5	770
1530	605	411
1531	617	274
1532	12	16
1533	5	770
1534	670	1245
1535	670	853
1536	670	853
1537	670	1245
1538	19	22
1539	12	0
1540	5	110
1541	145	0
1542	605	755
1543	12	160
1544	617	174
1545	670	0
1546	5	110
1547	806	0
1548	605	755
1549	670	1201
1550	822	546
1551	617	174
1552	617	174
1553	617	174
1554	12	66
1555	605	118
1556	41	120
1557	21	128
1558	12	66
1559	41	0
1560	19	148
1561	605	154
1562	812	811
1563	806	0
1564	690	554
1565	605	118
1566	690	0
1567	690	554
1568	812	811
1569	605	154
1570	670	865
1571	806	866
1572	21	128
1573	41	120
1574	19	0
1575	45	51
1576	45	51
1577	617	0
1578	1169	804
1579	1169	804
1580	832	0
1581	167	0
1582	690	847
1583	122	0
1584	41	0
1585	89	88
1586	61	0
1587	617	170
1588	89	88
1589	814	846
1590	617	170
1591	39	38
1592	36	82
1593	39	38
1594	629	0
1595	629	137
1596	629	137
1597	1180	543
1598	1180	543
1599	605	185
1600	1178	1258
1601	57	189
1602	605	185
1603	57	189
1604	611	73
1605	611	73
1606	670	562
1607	12	0
1608	12	50
1609	5	101
1610	605	133
1611	605	133
1612	97	142
1613	605	133
1614	5	101
1615	605	175
1616	605	133
1617	5	0
1618	1203	1234
1619	670	840
1620	1203	1234
1621	5	190
1622	605	175
1623	97	142
1624	605	25
1625	5	84
1626	611	143
1627	605	144
1628	605	25
1629	605	155
1630	605	155
1631	605	25
1632	605	144
1633	1228	0
1634	605	25
1635	611	143
1636	55	187
1637	5	84
1638	55	187
1639	81	0
1640	605	144
1641	249	6
1642	249	26
1643	71	0
1644	81	0
1645	36	0
1646	71	0
1647	596	149
1648	97	0
1649	249	6
1650	403	163
1651	403	163
1652	1175	0
1653	1178	0
1654	1203	0
1655	249	6
1656	596	149
1657	249	26
1658	1228	1262
1659	605	188
1660	690	1269
1661	605	188
1662	71	0
1663	41	0
1664	71	109
1665	12	0
1666	71	109
1667	1175	809
1668	670	0
1669	1175	0
1670	1175	809
1671	71	0
1672	605	28
1673	41	0
1674	0	0
1675	605	28
1676	97	0
1677	122	121
1678	122	0
1679	122	121
1680	1	176
1681	690	0
1682	605	28
1683	605	28
1684	832	0
1685	832	838
1686	857	560
1687	1203	861
1688	832	838
1689	1	176
1690	195	194
1691	55	54
1692	41	74
1693	41	74
1694	55	54
1695	690	851
1696	690	851
1697	81	0
1698	594	87
1699	594	183
1700	1228	0
1701	832	859
1702	594	87
1703	122	0
1704	594	183
1705	594	87
1706	594	33
1707	53	52
1708	53	52
1709	594	112
1710	53	52
1711	594	112
1712	53	52
1713	594	33
1714	690	862
1715	41	0
1716	0	0
1717	594	98
1718	1038	113
1719	0	0
1720	53	524
1721	53	524
1722	1038	113
1723	594	98
1724	53	524
1725	1266	867
1726	53	524
1727	44	0
1728	68	67
1729	1197	844
1730	1252	557
1731	594	0
1732	57	100
1733	57	100
1734	15	14
1735	594	119
1736	39	0
1737	594	119
1738	1180	0
1739	1195	0
1740	61	60
1741	61	60
1742	814	344
1743	814	344
1744	44	0
1745	1203	0
1746	806	871
1747	97	0
1748	19	0
1749	24	0
1750	635	31
1751	97	0
1752	635	31
1753	635	31
1754	5	151
1755	635	31
1756	597	0
1757	5	151
1758	53	179
1759	1203	860
1760	53	179
1761	5	4
1762	5	4
1763	5	444
1764	5	4
1765	24	126
1766	5	444
1767	24	0
1768	5	4
1769	5	4
1770	5	444
1771	597	0
1772	36	0
1773	1178	0
1774	5	182
1775	5	182
1776	864	863
1777	0	0
1778	43	0
1779	12	141
1780	947	0
1781	670	869
1782	36	40
1783	36	40
1784	12	59
1785	5	94
1786	12	59
1787	36	40
1788	24	0
1789	670	1139
1790	5	94
1791	1178	836
1792	5	94
1793	597	0
1794	1178	836
1795	670	1139
1796	5	94
1797	12	17
1798	36	35
1799	36	35
1800	48	47
1801	24	0
1802	36	35
1803	36	0
1804	12	17
1805	635	575
1806	635	575
1807	635	575
1808	597	0
1809	670	603
1810	635	575
1811	1178	818
1812	1178	0
1813	670	603
1814	1178	818
1815	12	91
1816	48	99
1817	103	102
1818	12	91
1819	103	102
1820	103	102
1821	1195	817
1822	48	99
1823	103	102
1824	670	1251
1825	670	1251
1826	1195	817
1827	15	199
1828	15	199
1829	45	0
1830	12	62
1831	12	62
1832	12	62
1833	670	808
1834	1169	0
1835	670	808
1836	670	808
1837	24	0
1838	5	125
1839	10	0
1840	5	125
1841	5	125
1842	802	0
1843	5	125
1844	597	0
1845	42	0
1846	0	0
1847	908	907
1848	927	926
1849	959	1078
1850	996	995
1851	908	1213
1852	908	1213
1853	581	1023
1854	581	1023
1855	581	1023
1856	581	1023
1857	1130	1023
1858	1130	1023
1859	1130	1023
1860	1130	1023
1861	1130	1023
1862	1130	1264
1863	581	1264
1864	581	1023
1865	581	909
1866	581	920
1867	581	909
1868	906	943
1869	581	920
1870	581	920
1871	581	909
1872	927	1060
1873	581	920
1874	581	909
1875	959	1074
1876	959	1074
1877	959	1074
1878	70	164
1879	959	1074
1880	1130	909
1881	1130	909
1882	1130	920
1883	959	1074
1884	1130	920
1885	959	1074
1886	1130	920
1887	927	1060
1888	906	943
1889	959	1074
1890	927	1060
1891	1130	909
1892	906	943
1893	1130	909
1894	959	1074
1895	1130	909
1896	1130	909
1897	1130	920
1898	70	164
1899	959	1074
1900	906	943
1901	959	1074
1902	581	909
1903	581	909
1904	925	600
1905	906	1050
1906	925	600
1907	925	1131
1908	906	1050
1909	906	1050
1910	1130	1220
1911	925	1131
1912	925	1131
1913	906	1050
1914	925	1131
1915	925	600
1916	906	1050
1917	906	1050
1918	581	1220
1919	46	0
1920	925	956
1921	46	0
1922	959	958
1923	581	998
1924	959	958
1925	581	998
1926	925	956
1927	581	998
1928	959	958
1929	1130	998
1930	996	1133
1931	959	958
1932	925	1189
1933	925	956
1934	1130	998
1935	1130	998
1936	1130	998
1937	996	1133
1938	925	956
1939	581	998
1940	996	1133
1941	996	1133
1942	925	956
1943	925	956
1944	925	1189
1945	908	1046
1946	908	1058
1947	908	1058
1948	908	1046
1949	908	1046
1950	908	1046
1951	908	1058
1952	908	1046
1953	908	1058
1954	908	1046
1955	906	905
1956	906	905
1957	906	1102
1958	906	905
1959	906	905
1960	906	1102
1961	906	905
1962	906	905
1963	906	988
1964	906	1033
1965	908	790
1966	906	1033
1967	906	988
1968	908	0
1969	906	1033
1970	908	1086
1971	908	1086
1972	908	1086
1973	908	1086
1974	93	0
1975	971	719
1976	971	738
1977	971	759
1978	971	1129
1979	971	1129
1980	908	1209
1981	971	0
1982	971	0
1983	971	759
1984	908	1209
1985	581	960
1986	925	972
1987	46	0
1988	581	960
1989	1130	960
1990	1130	960
1991	925	972
1992	925	972
1993	971	784
1994	971	0
1995	581	1052
1996	581	1052
1997	1130	1052
1998	1130	1052
1999	915	1034
[truncated: 50,790 more rows]
